# Supplementary material for: Controlling the 3D Electromagnetic Coupling in Co-Sputtered Ag–SiO2 Nanomace Arrays by Lateral Sizes
Source: MDPI journal article supplement (doi:10.3390/nano8070493), 2018-07-05
Supplement: s1 [file s1]

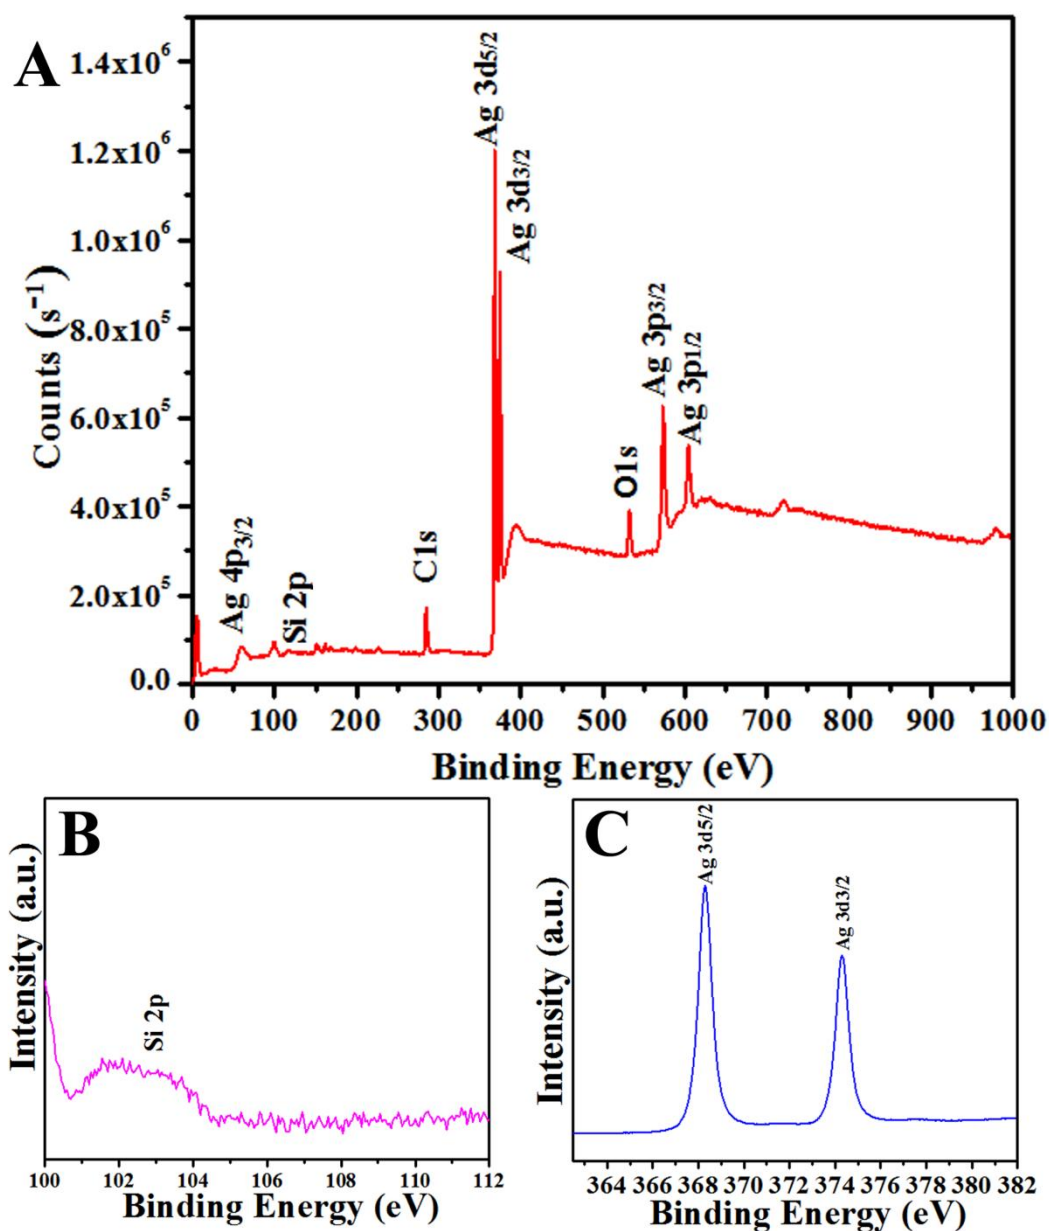

**Figure S1.** XPS spectra of (A) the full-scan spectrum; (B) Si 2p; (C) Ag 3d of SiO<sub>2</sub>-Ag nanomace arrays.

X-ray photoelectron spectroscopy (XPS) is used to analyze the compositions and chemical bonding states of Ag-SiO<sub>2</sub> nanomace arrays in Figure S1. Figure S1A shows the peaks of Ag, Si, C and O elements in the full-scan spectrum. As shown in Figure S1B, the peak of Si 2p at about 103.0 eV can be observed, indicating the formation of the Si-O-Si bond [1]. And the speak of O 1s located at 532.6 eV in Figure S1A, which is consistent with the binding energies for O 1s peaks obtained from SiO<sub>2</sub> [2]. Figure S1C shows the two binding energy of Ag 3d<sub>5/2</sub> and Ag 3d<sub>3/2</sub>, which can be assigned to peak of 368.27 and 374.28 eV, respectively.

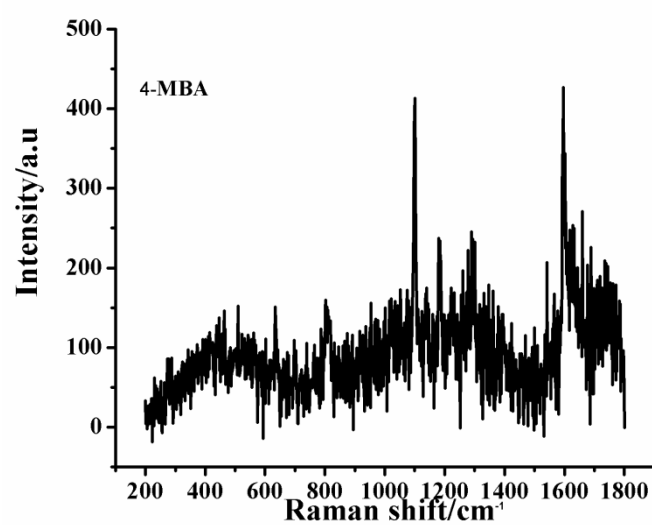

**Figure S2.** Raman spectra of solid 4-MBA excitation with wavelength was 514.5 nm (40 mW, power out of 1%).
